# Supplementary material for: Mu Opioid Receptor 1 (MOR-1) Expression in Colorectal Cancer and Oncological Long-Term Outcomes: A Five-Year Retrospective Longitudinal Cohort Study
Source: PubMed Central journal article supplement (PMC7016725; doi:10.3390/cancers12010134), 2020-01-05
Supplement: cancers-12-00134-s001.pdf [file cancers-12-00134-s001.pdf]

# Supplementary Materials: Mu Opioid Receptor 1 (MOR-1) Expression in Colorectal Cancer and Oncological Long-Term Outcomes: A Five-Year Retrospective Longitudinal Cohort Study

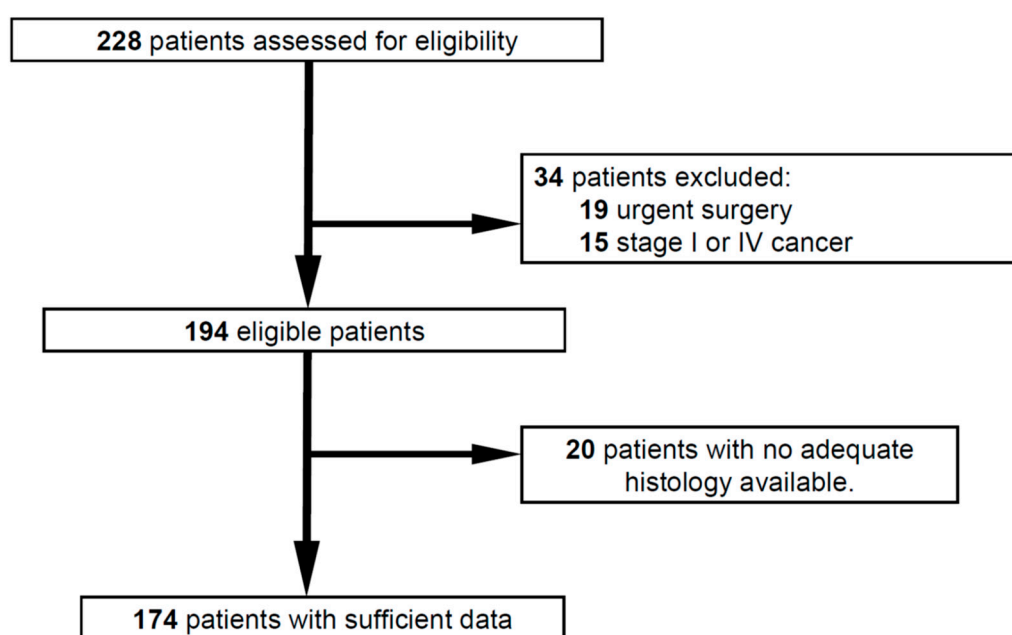

Figure S1. Patients' flowchart.

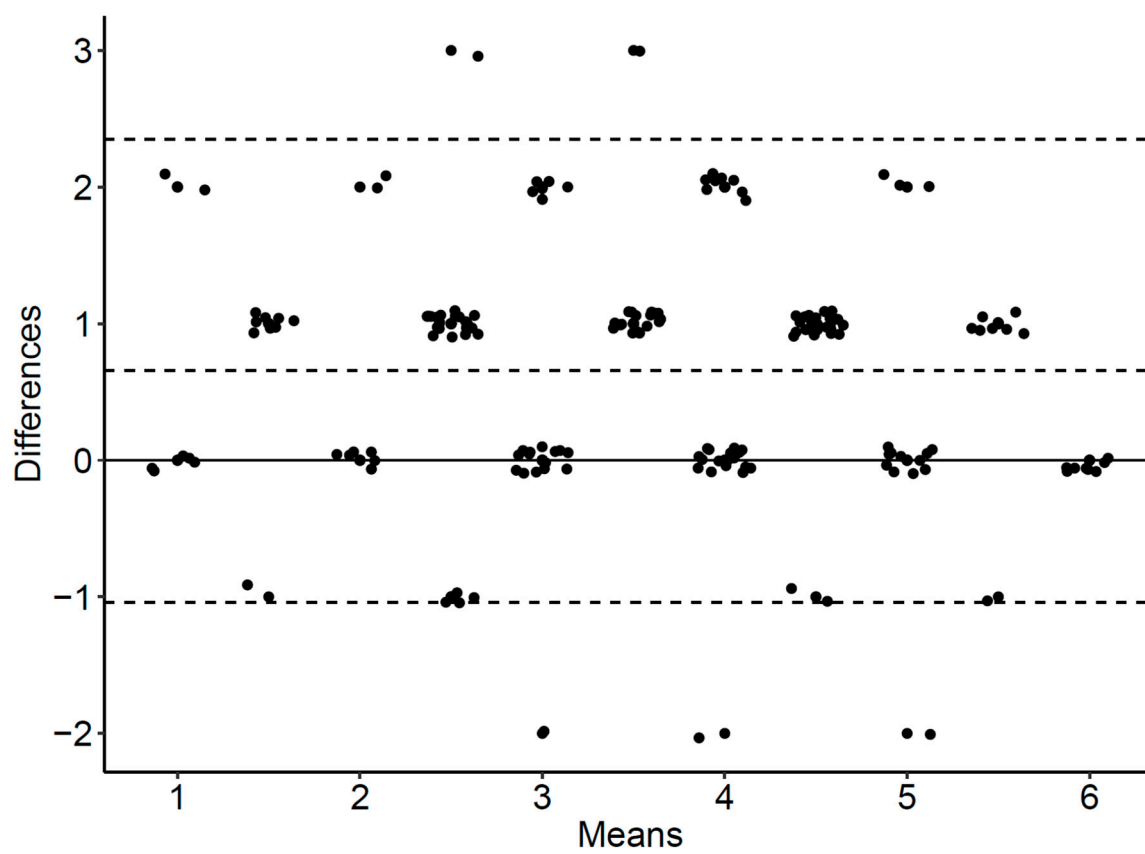

Figure S2. Bland–Altman plot of the agreement between two independent readings.

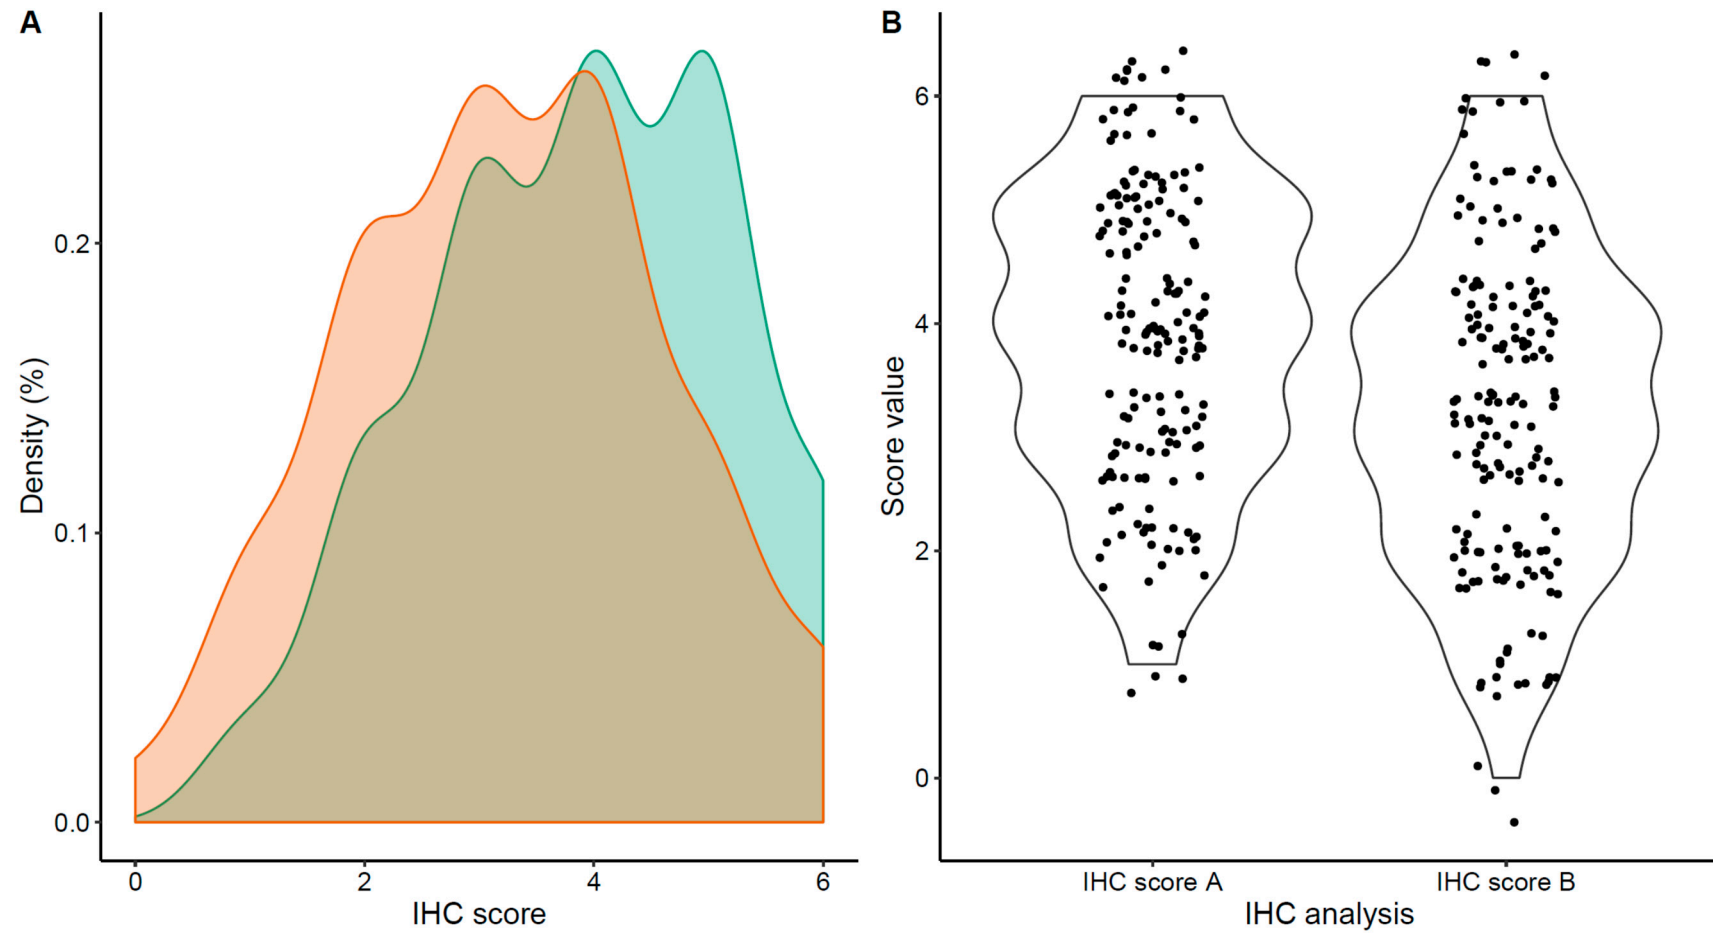

**Figure S3.** MOR-1 expression scoring: (a) Probability density plot of MOR-1 score, Green: IHC score A, Orange: IHC score B; (b) Scatterplot and Violin plot of score distribution by analysis.

**Table S1.** Association between Mu–opioid receptor expression score and oncological features.

| Characteristics                       | N   | Correlation | Lower– Upper 95% CI | P value |
|---------------------------------------|-----|-------------|---------------------|---------|
| <b>Ca 19–9 (U·mL<sup>-1</sup>)</b>    | 124 | –0.07*      | –0.26 – 0.12        | 0.448   |
| <b>CEA (U·mL<sup>-1</sup>)</b>        | 163 | 0.05*       | –0.09 – 0.22        | 0.497   |
| <b>Number of positive lymph nodes</b> | 174 | 0.15*       | 0.003 – 0.29        | 0.044   |
| <b>Duke stage</b>                     |     | 0.19**      | 0 – 0.31            | 0.119   |
| A                                     | 2   |             |                     |         |
| B                                     | 78  |             |                     |         |
| C                                     | 71  |             |                     |         |
| D                                     | 2   |             |                     |         |
| <b>Cancer stage</b>                   |     | 0.15**      | 0 – 0.28            | 0.053   |
| II                                    | 96  |             |                     |         |
| III                                   | 78  |             |                     |         |
| <b>Resection margin</b>               |     | 0.008**     | 0 – 0.13            | 0.926   |
| R+                                    | 25  |             |                     |         |
| R0                                    | 110 |             |                     |         |
| <b>Tumoral tissue differentiation</b> |     | 0.06**      | 0 – 0.18            | 0.717   |
| Poor/Undifferentiated                 | 20  |             |                     |         |
| Moderately differentiated             | 132 |             |                     |         |
| Well differentiated                   | 17  |             |                     |         |

*Ca 19-9*, Gastrointestinal Cancer Antigen; *CEA*, Carcinoembryonic antigen; *R+*, positive margin; *R0*, negative margin; *CI*, Confidence interval. \* Spearman correlation coefficient. \*\* square root of ANOVA  $\eta^2$

**Table S2.** Multivariable logistic regression model for complications at 28 postoperative days.

|                                                                        | Odds Ratio | Lower – Upper 95%CI | P value |
|------------------------------------------------------------------------|------------|---------------------|---------|
| <b>MOR expression tumor tissues</b>                                    | 0.711      | 0.340 – 1.310       | 0.305   |
| <b>MOR expression non–tumour tissue</b>                                | 0.555      | 0.188 – 1.400       | 0.237   |
| <b>First postoperative 96 hours opioid dose (morphine equivalents)</b> | 1.012      | 0.989 – 1.039       | 0.342   |
| <b>First postoperative 96 hours transfusion (yes)</b>                  | 0.819      | 0.123 – 5.055       | 0.828   |
| <b>Gender (Female)</b>                                                 | 0.391      | 0.052 – 2.100       | 0.299   |
| <b>ASA (Reference category = 1)</b>                                    |            |                     |         |
| 2                                                                      | –0.147     | –2.438 – 1.510      | 0.996   |
| ≥3                                                                     | 0.224      | –2.066 – 2.395      | 0.995   |
| <b>Surgery duration (minutes)</b>                                      | 1.004      | 0.991 – 1.018       | 0.539   |
| <b>Arterial Hypertension (yes)</b>                                     | 4.383      | 0.717 – 42.894      | 0.141   |
| <b>Number of affected lymph nodes</b>                                  | 3.610      | 1.546 – 10.789      | 0.008   |
| <b>Serum total proteins (g·dL<sup>-1</sup>)</b>                        | 1.024      | 0.832 – 1.920       | 0.879   |
| <b>Smoker (yes)</b>                                                    | 0.779      | 0.026 – 9.585       | 0.86    |
| <b>Age (years)</b>                                                     | 1.007      | 0.921 – 1.107       | 0.878   |

*MOR*, Mu–opioid receptor; *ASA*, American Society of Anesthesiology; *CI*, Confidence Interval.

**Table S3.** Study's REMARK profile.

| <b>A. Patients, treatment and variables</b> |                                                                                                                                                                                                                                                                                                                                                                                                                                                                                                                                                                                                                                                                                                                                                                                                                                                                   |
|---------------------------------------------|-------------------------------------------------------------------------------------------------------------------------------------------------------------------------------------------------------------------------------------------------------------------------------------------------------------------------------------------------------------------------------------------------------------------------------------------------------------------------------------------------------------------------------------------------------------------------------------------------------------------------------------------------------------------------------------------------------------------------------------------------------------------------------------------------------------------------------------------------------------------|
| Study and marker                            | Remarks                                                                                                                                                                                                                                                                                                                                                                                                                                                                                                                                                                                                                                                                                                                                                                                                                                                           |
| Marker                                      | MOR-1: Immunohistochemical cell staining assessed on an ordinal scale from 0 to 6 (see Table 3) in tumour tissue                                                                                                                                                                                                                                                                                                                                                                                                                                                                                                                                                                                                                                                                                                                                                  |
| Further variables                           | v1= Gender<br>v2= Anaesthetic agent (intravenous vs. halogenated)<br>v3= Complication in the first 28 postoperative days (yes/no)<br>v4= Amount of opioid drugs administered in the first 96 postoperative hours (in morphine equivalents)<br>v5= Blood transfusion in the first 96 postoperative hours<br>v6= Epidural analgesia (yes/no) v7= neo-adjuvant radiotherapy<br>v8 = Neo-adjuvant chemotherapy<br>v9 = Adjuvant chemotherapy<br>v10= Adjuvant radiotherapy<br>v11= ASA risk score<br>v12 = Duration of surgery<br>v13= Preoperative Haemoglobin value<br>v14= Stage III cancer (%)<br>v15 = Reintervention<br>v16= MOR-1 expression in non-tumor tissue<br>v17= Carcinoembryonic antigen value at diagnosis (log scale)<br>v18= Number of positive lymph nodes (log scale)<br>v19= Age<br>v20 = Arterial Hypertension<br>v21= Diabetes<br>v23= Smoker |

## v24= Preoperative Plasma Total Protein

| Patients                 | N   | Remarks                                                                                                                               |
|--------------------------|-----|---------------------------------------------------------------------------------------------------------------------------------------|
| Assessed for eligibility |     | <i>Disease:</i> Colorectal cancer stage II and III.                                                                                   |
|                          | 228 | <i>Patients:</i> Surgery 2010 to 2013, Hospital Universitario la Fe, Valencia, Spain.<br><i>Sample:</i> Archived specimens available. |
| Excluded                 | 54  |                                                                                                                                       |
| Included                 | 174 |                                                                                                                                       |
| With outcome events      | 174 |                                                                                                                                       |

**B. Statistical analyses of outcomes**

| Analysis                                                            | Patients | Events | Variable considered         | Results/Remarks                                                                                 |
|---------------------------------------------------------------------|----------|--------|-----------------------------|-------------------------------------------------------------------------------------------------|
| A1: MOR-1 expression in tumour and non-tumour tissue                | 174      | -      | MOR-1 , v18                 | Text (Page 5,Line 76)                                                                           |
| A2: DFS Univariable                                                 | 174      | 40     | MOR-1                       | Text (Page 4,Line 88)                                                                           |
| A3: DFS Multivariable. Variable selection process                   | 109      | 25     | MOR-1,v1 to v24             | Elastic net with hyperparameters estimated by cross validation<br>$\alpha = 0.8 \lambda = 0.1$  |
| A4a: Adjusted Effect of MOR -1on DFS                                | 135      | 30     | MOR-1,v5,v11,v13,v17 to v19 | Table 2                                                                                         |
| A4b: Adjusted Effect of MOR-1 on DFS with missing values imputation | 174      | 40     | MOR-1,v5,v11,v13,v17 to v19 | Table 2                                                                                         |
| A5: OS Univariable                                                  | 174      | 40     | MOR-1                       | Text (Page 4, Line 90)                                                                          |
| A6: OS Multivariable. Variable selection process                    | 109      | 26     | MOR-1,v1 to v24             | Elastic net with hyperparameters estimated by cross validation<br>$\alpha = 0.8 \lambda = 0.08$ |
| A7: Adjusted Effect of MOR -1 on OS                                 | 135      | 29     | MOR-1,v5,v11,v13,v17 to v19 | Table 2                                                                                         |
| A7b: Adjusted Effect of MOR-1 on OS with missing values imputation  | 174      | 40     | MOR-1,v5,v11,v13,v17 to v19 | Table 2                                                                                         |

|                                                |     |    |                                                       |                                                                                                 |
|------------------------------------------------|-----|----|-------------------------------------------------------|-------------------------------------------------------------------------------------------------|
| A8: Complications Univariable                  | 174 | 32 | MOR-1                                                 | Text (Page 6, Line 113)                                                                         |
| A9: Complications Multivariable                | 87  | 11 | MOR-1, v1 to v24 omitting v15 which is a complication | Elastic net with hyperparameters estimated by cross validation<br>$\alpha = 0.8 \lambda = 0.08$ |
| A10: Adjusted Effect of MOR-1 on complications | 74  | 16 | MOR-1, v1,v4,v5,v11,v12,v15, v18,v20,v23,v24          | Table S2                                                                                        |

**Table S4.** Multivariable Cox regression model for disease free survival and overall survival at 5 years follow-up. Sensitivity analysis with chemotherapy and tumor stage as covariables.

|                                                       |  | <b>Complete cases model</b> |                     |          |
|-------------------------------------------------------|--|-----------------------------|---------------------|----------|
| <b>Disease free survival model</b>                    |  | <b>N = 132 Events = 30</b>  |                     |          |
|                                                       |  | Hazard Ratio                | Lower – Upper 95%CI | P –value |
| <b>MOR expression</b>                                 |  | 0.786                       | 0.597 – 1.036       | 0.087    |
| <b>First postoperative 96 hours transfusion (yes)</b> |  | 1.069                       | 0.418 – 2.73        | 0.889    |
| <b>ASA (Reference category = 1)</b>                   |  |                             |                     |          |
| 2                                                     |  | 0.587                       | 0.122 – 2.816       | 0.506    |
| 3                                                     |  | 0.855                       | 0.176 – 4.147       | 0.845    |
| 4                                                     |  | 1.126                       | 0.132 – 9.603       | 0.913    |
| <b>Preoperative Hemoglobin (g·dL<sup>-1</sup>)</b>    |  | 1.050                       | 0.850 – 1.297       | 0.649    |
| <b>Number of affected lymph nodes</b>                 |  | 1.871                       | 1.177 – 2.974       | 0.008    |
| <b>CEA at diagnosis (U·mL<sup>-1</sup>)</b>           |  | 1.200                       | 0.830 – 1.735       | 0.333    |
| <b>Age (years)</b>                                    |  | 1.021                       | 0.978 – 1.066       | 0.349    |
| <b>Stage III (yes)</b>                                |  | 0.793                       | 0.287 – 2.194       | 0.655    |
| <b>Adjuvant chemotherapy (yes)</b>                    |  | 1.304                       | 0.528 – 3.22        | 0.565    |
| <b>Overall survival model</b>                         |  | <b>N = 132 Events = 29</b>  |                     |          |
| <b>MOR expression</b>                                 |  | 0.982                       | 0.754 – 1.278       | 0.891    |
| <b>First postoperative 96 hours transfusion (yes)</b> |  | 1.555                       | 0.649 – 3.726       | 0.322    |
| <b>ASA score (Reference category = 1)</b>             |  |                             |                     |          |
| 2                                                     |  | 0.993                       | 0.119 – 8.272       | 0.995    |
| 3                                                     |  | 1.969                       | 0.241 – 16.092      | 0.527    |
| 4                                                     |  | 2.526                       | 0.215 – 29.625      | 0.461    |
| <b>Preoperative Hemoglobin (g·dL<sup>-1</sup>)</b>    |  | 0.916                       | 0.734 – 1.143       | 0.435    |
| <b>Number of affected lymph nodes</b>                 |  | 1.340                       | 0.800 – 2.245       | 0.265    |
| <b>CEA at diagnosis (U·mL<sup>-1</sup>)</b>           |  | 1.639                       | 1.156 – 2.324       | 0.006    |
| <b>Age (years)</b>                                    |  | 1.036                       | 0.992 – 1.082       | 0.114    |
| <b>Stage III (yes)</b>                                |  | 1.236                       | 0.426 – 3.588       | 0.696    |
| <b>Adjuvant chemotherapy (yes)</b>                    |  | 1.380                       | 0.567 – 3.363       | 0.478    |



---

MOR-1 expression is introduced in both models as a 0 to 6 ordinal variable. The effect estimate is thus to be interpreted as the difference in hazard in the monitored time period when MOR-1 expression increases one level.

---

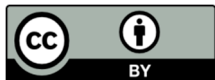

© 2019 by the authors. Submitted for possible open access publication under the terms and conditions of the Creative Commons Attribution (CC BY) license (<http://creativecommons.org/licenses/by/4.0/>).
